# Supplementary material for: Investigation of a novel high-efficiency ion-permselective membrane module based on the electrochemically switched ion exchange scheme
Source: Royal Society of Chemistry journal article supplement (doi:10.1039/d1ra00924a), 2021-01-01
Supplement: d1ra00924a1.pdf [file d1ra00924a1.pdf]

Investigate of a novel high-efficiency ion permselectivity membrane module based on  
ESIX scheme

Di Zhang <sup>a</sup>, Pengle Zhang <sup>b</sup>, Du Xiao <sup>b</sup>, Xiaogang Hao <sup>b,\*</sup>

<sup>a</sup> Department of Chemistry, Shanxi Medical University, 56 Xinjian South Road,  
Taiyuan, 030001, China

<sup>b</sup> Department of Chemical Engineering, Taiyuan University of Technology, Taiyuan,  
030024, China

\* Corresponding author.

E-mail: [xghao@tyut.edu.cn](mailto:xghao@tyut.edu.cn) (X. Hao)

Tel.: + 86 351-6018193; Fax: + 86 351-6018554;

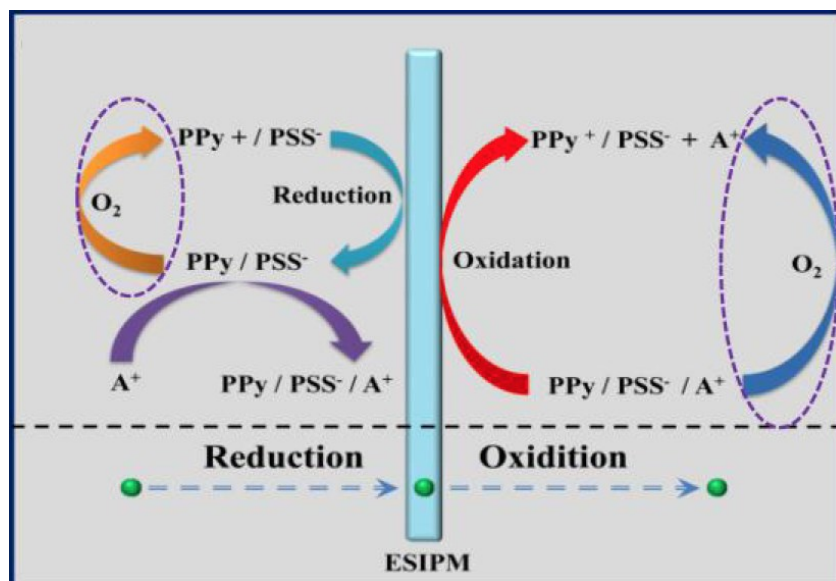

**Figure S1.** Effect of the dissolved oxygen in the solutions on the cations transport through the PPy/PSS membrane.

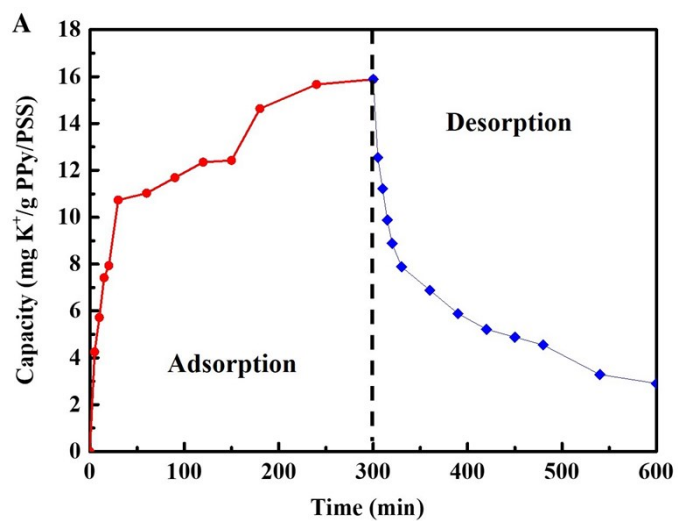

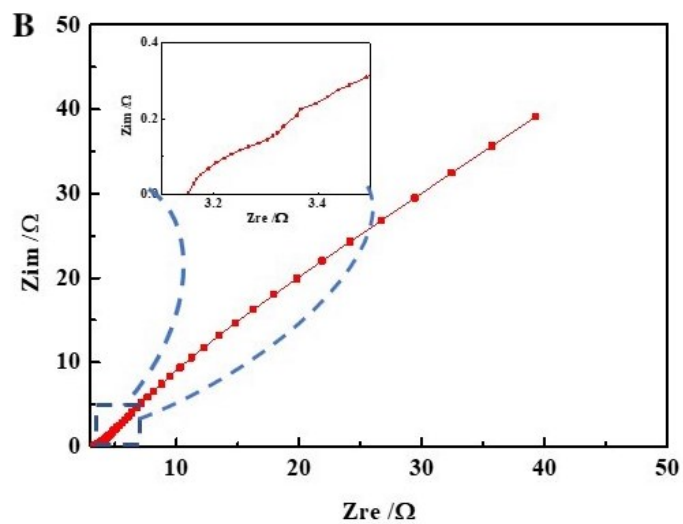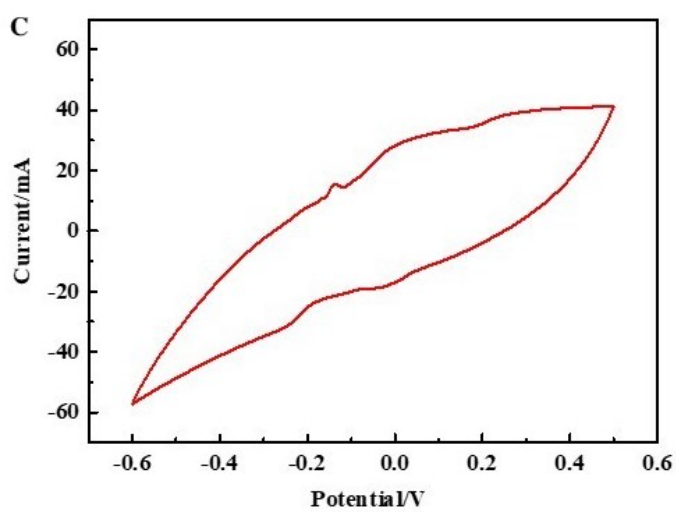

**Figure S2.** (A) The adsorption and desorption curves of  $K^+$  ions on the PPy/PSS membrane; (B) The impedance of the membrane; (C) CV curves of the PPy/PSS membrane as electrode.
